# Supplementary material for: DoMYB5 and DobHLH24, Transcription Factors Involved in Regulating Anthocyanin Accumulation in Dendrobium officinale
Source: MDPI journal article supplement (doi:10.3390/ijms24087552), 2023-04-20
Supplement: s1 [file s1]

Table S1. Primers used in this study.

| Primer Name                                                  | Sequence                                                        |
|--------------------------------------------------------------|-----------------------------------------------------------------|
| <b>For PCR</b>                                               |                                                                 |
| <i>DoMYB5</i> -F                                             | 5'-ATGGGAAGGAATTCGTGCAG-3'                                      |
| <i>DoMYB5</i> -R                                             | 5'-CTAGAATCCACCTCCAATATCAAATAAAG-3'                             |
| <i>DobHLH24</i> -F                                           | 5'-ATGAAACCAGTCAGCATGGAAGAG-3'                                  |
| <i>DobHLH24</i> -R                                           | 5'-TTAATGGGATAAGAGTTCATGAATTGTCC-3'                             |
| <i>proDoCHS</i> -1F                                          | 5'-ACTTCCACGGGACCACTACTTGAGGC-3'                                |
| <i>proDoCHS</i> -1R                                          | 5'-GCTGGTTGATGGATGGAAGCTTGAGAAG-3'                              |
| <i>proDoCHS</i> -2F                                          | 5'-ACTTCCACCGGACCACTACC-3'                                      |
| <i>proDoCHS</i> -2R                                          | 5'-GCTGGTTGATGGATGGAAGCTT-3'                                    |
| <i>proDoDFR</i> -1F                                          | 5'-TTCAACTCACTCTCTAGTCTTATC-3'                                  |
| <i>proDoDFR</i> -1R                                          | 5'-GAATATTTTCAGTCTCAGTTTATTAAAGA-3'                             |
| <b>For qPCR in <i>Dendrobium officinale</i></b>              |                                                                 |
| q <i>DoMYB5</i> -F                                           | 5'-TAATCCGAACAACGGCAATAAG-3'                                    |
| q <i>DoMYB5</i> -R                                           | 5'-AGCATCCAGGTCTCAAAATCC-3'                                     |
| q <i>DobHLH24</i> -F                                         | 5'-CGTCGCAAAGCGAGAGATTG-3'                                      |
| q <i>DobHLH24</i> -R                                         | 5'-TTGTTCTGCGCTTCTTTGCC-3'                                      |
| q <i>DoActin</i> -F                                          | 5'-TCCCAAGGCAAACAGAGAAA-3'                                      |
| q <i>DoActin</i> -R                                          | 5'-GGCCACTAGCATATAGGGAAAG-3'                                    |
| <b>Transient <i>Dendrobium officinale</i> transformation</b> |                                                                 |
| <i>DoMYB5</i> -pTRV2e-F                                      | 5'- <u>CGACGACAAGACCCTGCAG</u><br>ATGGGAAGGAATTCGTGCAG-3'       |
| <i>DoMYB5</i> -pTRV2e-R                                      | 5'- <u>GAGGAGAAGAGCCCTGCAG</u><br>CTAGAATCCACCTCCAATATCA-3'     |
| <i>DobHLH24</i> -pTRV2e-F                                    | 5'- <u>CGACGACAAGACCCTGCAG</u><br>ATGAAACCAGTCAGCATGGAAGA-3'    |
| <i>DobHLH24</i> -pTRV2e-R                                    | 5'- <u>GAGGAGAAGAGCCCTGCAG</u><br>TTAATGGGATAAGAGTTCATGAATT-3'  |
| <b>Transient tobacco transformation</b>                      |                                                                 |
| <i>DoMYB5</i> -pSAK277-F                                     | 5'- <u>ACTAGTGGATCCAAAGAATTC</u><br>ATGGGAAGGAATTCGTGCAGTTT-3'  |
| <i>DoMYB5</i> -pSAK277-R                                     | 5'- <u>GAAGTACTCTCGAGAAGCTT</u><br>CTAGAATCCACCTCCAATATCAAAT-3' |
| <i>DobHLH24</i> -pSAK277-F                                   | 5'- <u>ACTAGTGGATCCAAAGAATTC</u><br>ATGAAACCAGTCAGCATGGA-3'     |
| <i>DobHLH24</i> -pSAK277-R                                   | 5'- <u>GAAGTACTCTCGAGAAGCTT</u><br>TTAATGGGATAAGAGTTCAT-3'      |
| <b>For qPCR in transgenic tobacco</b>                        |                                                                 |
| q <i>NtCHS</i> -F                                            | 5'-GTACAACCTAGTGGTGTAGACA-3'                                    |
| q <i>NtCHS</i> -R                                            | 5'-CCAACTTCACGAAGGTGAC-3'                                       |
| q <i>NtCHI</i> -F                                            | 5'-GAAATCCTCCGATCCAGTGA-3'                                      |
| q <i>NtCHI</i> -R                                            | 5'-CAACGTTGACAACATCAGGC-3'                                      |
| q <i>NtF3H</i> -F                                            | 5'-ACAGGGTGAAGTGGTCCAAG-3'                                      |

|                     |                             |
|---------------------|-----------------------------|
| q <i>NtF3H</i> -R   | 5'-CCTTGGTTAAGGCCTCCTTC-3'  |
| q <i>NtF3'</i> H-F  | 5'-TCCAAGAATACTGGCCCAAG-3'  |
| q <i>NtF3'</i> H-R  | 5'-CTCACAACCTCTCGGATGCAA-3' |
| q <i>NtDFR</i> -F   | 5'-AACCAACAGTCAGGGGAATG-3'  |
| q <i>NtDFR</i> -R   | 5'-TTGGGCATCGAGAGTTCCAG-3'  |
| q <i>NtANS</i> -F   | 5'-TGCGTGTGAAGCTCATACTG-3'  |
| q <i>NtANS</i> -R   | 5'-GGAATTAGGCACACACTTTGC-3' |
| q <i>NtUFGT</i> -F  | 5'-CAATGTTTGGGATGGTGTCA-3'  |
| q <i>NtUFGT</i> -R  | 5'-TTCCTCCTCTGCCTCTTTCA-3'  |
| q <i>NtAn1a</i> -F  | 5'-ACCATTCTCGAACACCGAAG-3'  |
| q <i>NtAn1a</i> -R  | 5'-TGCTAGGGCACAATGTGAAG-3'  |
| q <i>NtAn1b</i> -F  | 5'-CTTGAACACTTCTCAAACCGA-3' |
| q <i>NtAn1b</i> -R  | 5'-TGCTAGGGCACAATGTGAAG-3'  |
| q <i>NtActin</i> -F | 5'-AATGATCGGAATGGAAGCTG-3'  |
| q <i>NtActin</i> -R | 5'-TGGTACCACCACTGAGGACA-3'  |

**For yeast one-hybrid analysis**

|                                    |                                                                  |
|------------------------------------|------------------------------------------------------------------|
| <i>DoMYB5</i> -pGADT7-Rec2-F       | 5'- <u>ACCAGATTACGCTCATATG</u><br>ATGGGAAGGAATTCGTGCAGTT-3'      |
| <i>DoMYB5</i> -pGADT7-Rec2-R       | 5'- <u>CGATTCATCTGCAGCTCGAG</u><br>CTAGAATCCACCTCCAATATCA-3'     |
| <i>DobHLH24</i> -<br>pGADT7-Rec2-F | 5'- <u>ACCAGATTACGCTCATATG</u><br>ATGAAACCAGTCAGCATGGAAGA-3'     |
| <i>DobHLH24</i> -<br>pGADT7-Rec2-R | 5'- <u>CGATTCATCTGCAGCTCGAG</u><br>TTAATGGGATAAGAGTTCATGAATT -3' |
| <i>proDoCHS</i> -pHIS2-F           | 5'- <u>CTATAGGGCGAATTC</u><br>ACTTCCACCGGACCACTACCT-3'           |
| <i>proDoCHS</i> -pHIS2-R           | 5'- <u>GCGAACGCGTGAGCTC</u><br>GCTGGTTGATGGATGGAAGCTT-3'         |
| <i>proDoDFR</i> -pHIS2-F           | 5'- <u>CTATAGGGCGAATTC</u><br>TTCAACTCACTCTCTAGTCTTATCA -3'      |
| <i>proDoDFR</i> -pHIS2-R           | 5'- <u>GCGAACGCGTGAGCTC</u><br>GAATATTTTCAGTCTCAGTTTATTAA -3'    |

**For yeast two-hybrid analysis**

|                       |                                                              |
|-----------------------|--------------------------------------------------------------|
| <i>DoMYB5</i> -AD-F   | 5'- <u>ACCAGATTACGCTCATATG</u><br>ATGGGAAGGAATTCGTGCAGTT-3'  |
| <i>DoMYB5</i> -AD-R   | 5'- <u>CGATTCATCTGCAGCTCGAG</u><br>CTAGAATCCACCTCCAATATCA-3' |
| <i>DobHLH24</i> -BD-F | 5'- <u>TCAGAGGAGGACCTGCATATG</u><br>ATGAAACCAGTCAGCAT-3'     |
| <i>DobHLH24</i> -BD-R | 5'- <u>TTCGGCCTCCATGGCCATATG</u><br>TTAATGGGATAAGAGTTC-3'    |

**Dual luciferase assay**

|                          |                                                                |
|--------------------------|----------------------------------------------------------------|
| <i>DoMYB5</i> -pSAK277-F | 5'- <u>ACTAGTGGATCCAAAGAATTC</u><br>ATGGGAAGGAATTCGTGCAGTTT-3' |
|--------------------------|----------------------------------------------------------------|

|                                  |                                                                  |
|----------------------------------|------------------------------------------------------------------|
| <i>DoMYB5</i> -pSAK277-R         | 5'- <u>GAAGTACTCTCGAGAAGCTT</u><br>CTAGAATCCACCTCCAATATCAAAT-3'  |
| <i>DobHLH24</i> -pSAK277-F       | 5'- <u>ACTAGTGGATCCAAAGAATTC</u><br>ATGAAACCAGTCAGCATGGA-3'      |
| <i>DobHLH24</i> -pSAK277-R       | 5'- <u>GAAGTACTCTCGAGAAGCTT</u><br>TTAATGGGATAAGAGTTCAT-3'       |
| <i>proDoCHS</i> - pGreenII0800-F | 5'- <u>ACTATAGGGCGAATTGGGTACC</u><br>ACTTCCACCGGACCACTACCT -3'   |
| <i>proDoCHS</i> - pGreenII0800-R | 5'- <u>TGCAGGAATTCGATATCAAGCTT</u><br>GCTGGTTGATGGATGGAAGCTT -3' |
| <i>proDoDFR</i> - pGreenII0800-F | 5'- <u>TCGACGGTATCGATAAGCTT</u><br>TTCAACTCACTCTCTAGTCTTATCA-3'  |
| <i>proDoDFR</i> - pGreenII0800-R | 5'- <u>GCTCTAGAACTAGTGGATCC</u><br>GAATATTTTCAGTCTCAGTTTATTAA-3' |

---
